# Supplementary material
Source: Springer Nature journal article supplement (https://www.springermedizin.de/resource/supplementary/12885_2009_1999_MOESM1_ESM.pdf/9460278)

Figure 1A

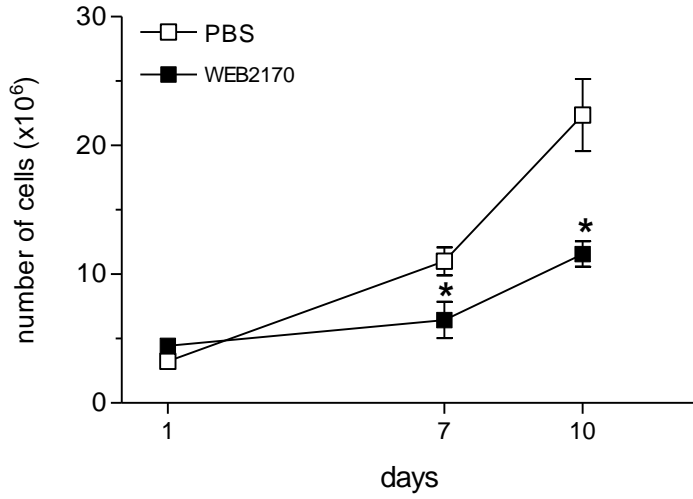

Figure 1B

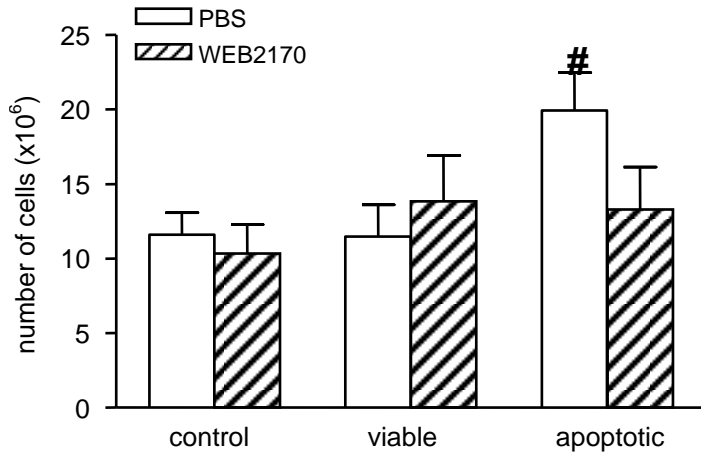

Supplement: MOESM1 [file 9460278]
